# Supplementary material
Source: Elsevier journal article supplement (https://www.sciencedirect.com/science/article/pii/S2530064417302067)
Supplement: mmc1 [file S2530064417302067:mmc1.docx]

**Table S1**: List of bird species and studies we used in this review (the order of this list is based on the American Ornithological Society/South American Classification Committee). We included information about conservation status, samples analysed, laboratory methodologies, suspected lead source, concentration found, presence of individual upper threshold levels and bibliographic reference for each species.

| **Order** | **Scientific name** | **Common name** | **Conservation status IUCN** | **Sampled type and methodology** | **Presumed Source of lead** | **Concentration Mean ± SD and Range**  **mg/kg dry mass (dm) or mg/kg wet mass (wm)** | **Individuals upper threshold levels **** | **Article and country** |
| --- | --- | --- | --- | --- | --- | --- | --- | --- |
| **Tinamiformes** | *Nothoprocta ornata* | Ornate tinamou | Least concern | Feathers, liver and kidney  Inductively Coupled Plasma Mass Spectrometry | Mining | **Non Polluted sites 1**  **Liver:** 0.10 ± 0.17 mg/kg dm (0.0065-0.61) n=13  **Kidney:** 0.48 ± 0.62 mg/kg dm (0.08–2.45) n=13  **Feathers:** 1.33 ± 2.1 mg/kg dm (0.17–7.81) n=13  **Polluted sites**  **Liver:** 0.75 ± 1.19 mg/kg dm (0.19–4.09) n=10  **Kidney**: 1.75 ± 0.65 mg/kg dm (0.82–2.58) n=10  **Feathers:** 7.76 ± 8.94 mg/kg dm (1.70–25.2) n=10 | Yes | Garitano-Zavala et al., 2010  **Bolivia** |
|  | *Nothura darwinii* | Darwin's nothura | Least concern | Feathers, liver, kidney  Inductively Coupled Plasma Mass Spectrometry | Mining | **Liver:** 0.29 ± 0.23 mg/kg dm (0.06–0.72)  n=6 **Kidney**: 10.71 ± 19.66 mg/kg dm (1.03–50.64)  n=6  **Feathers:** 16.52 ± 24.96 mg/kg dm (3.13–67.26) n=6 | Yes | Garitano-Zavala et al., 2010  **Bolivia** |
| **Order** | **Scientific name** | **Common name** | **Conservation status IUCN** | **Sampled type and methodology** | **Presumed Source of lead** | **Concentration Mean ± SD and Range**  **mg/kg dry mass (dm) or mg/kg wet mass (wm)** | **Individuals upper threshold levels **** | **Article and country** |
| **Anseriformes** | *Dendrocygna bicolor* | Fulvous whistling-duck | Least concern | Bone  Atomic absorption with Electrothermic Atomization | Lead ammunition | **Bone:** Some individuals show values upper> 20 mg/Kg dm n=14 | Yes | Ferreyra et al., 2009  **Argentina** |
|  | *Dendrocygna bicolor* | Fulvous whistling-duck | Least concern | Liver, bone and blood  Inductively Coupled Plasma-Atomic Emission Spectrometry | Lead ammunition | **Inland wetlands 2011**  **Liver:** 17.10 ± 5.33 mg/Kg dm (0.6–196) n=9  **Bone:** 42.40 ± 4.86 mg/Kg dm (1–224) n=9  **Island wetlands 2011**  **Liver:** 0.26 ± 3.63 mg/Kg dm (BDL -116.50) n=92  **Bone:** 4.32 ± 0.90 mg/Kg dm (0.33–388) n=77  **Island wetlands 2012**  **Liver:** 0.98 ± 3.31 mg/Kg dm (0.42–2.29) n=2  **Bone:** 5.8 ± 1.3 mg/Kg dm (4.8–7) n=2  **Blood:** 0.31 mg/Kg wm n=1 | Yes | Ferreyra et al., 2014  **Argentina** |
|  | *Dendrocygna bicolor* | Fulvous whistling-duck | Least concern | Liver, bone and blood  Inductively Coupled Plasma-Atomic Emission Spectrometry | Lead ammunition | **Liver:** 0.39 ± 5.87 mg/Kg dm (BDL-136)  **Bone:** 5.49 ± 5.52 mg/Kg dm (0.33–388.5) n=33-103  **Blood**: 0.31 mg/Kg wm 0.31 n=1 | Yes | Ferreyra et al., 2015  **Argentina** |
| **Order** | **Scientific name** | **Common name** | **Conservation status IUCN** | **Sampled type and methodology** | **Presumed Source of lead** | **Concentration Mean ± SD and Range**  **mg/kg dry mass (dm) or mg/kg wet mass (wm)** | **Individuals upper threshold levels **** | **Article and country** |
|  | *Dendrocygna viduata* | Black-bellied whistling-duck | Least concern | Liver, bone and blood  Inductively Coupled Plasma-Atomic Emission Spectrometry | Lead ammunition | **Inland wetlands 2011**  **Liver:** 2.5 ± 5.87 mg/Kg dm (0.91–35.10) n=4  **Bone:** 3.65 ± 4.72 mg/Kg dm (0.45–17.90) n=9  **Island wetlands 2011**  **Liver:** 0.25 ± 2.72 mg/Kg dm (BDL -25.10) n=80  **Bone:** 3.1 ± 3.69 mg/Kg dm (0.36–89.70) n=71  **Inland wetlands 2012**  **Liver:** 0.31 ± 3.98 mg/Kg dm (BDL-11.80) n=34  **Bone:** 3.30 ± 2.50 mg/Kg dm (0.90–43.20) n=34  **Island wetlands 2012**  **Liver:** 0.24 ± 2.17 mg/Kg dm (BDL-1.40) n=16  **Bone:** 5.45 ± 3.52 mg/Kg dm (1.10–38.60) n=16  **Blood:** (2011) 0.26 ± 2.77 mg/Kg wm (BDL-2.66) n=12  **Blood:** (2012) 0.21 ± 2.70 mg/Kg wm (BDL-5.75) n=53 | Yes | Ferreyra et al., 2014  **Argentina** |
| **Order** | **Scientific name** | **Common name** | **Conservation status IUCN** | **Sampled type and methodology** | **Presumed Source of lead** | **Concentration Mean ± SD and Range**  **mg/kg dry mass (dm) or mg/kg wet mass (wm)** | **Individuals upper threshold levels **** | **Article and country** |
|  | *Dendrocygna viduata* | Black-bellied whistling-duck | Least concern | Liver, bone and blood  Inductively Coupled Plasma-Atomic Emission Spectrometry | Lead ammunition | **Liver**: 0.29 ± 3.22 mg/Kg dm (BDL-35.10)  **Bone:** 3.40 ± 3.37 mg/Kg dm (0.36–89.7) n= 76-134  **Blood**: 0.21 ± 2.59 mg/Kg wm (BDL–5.75) n=45 | Yes | Ferreyra et al., 2015  **Argentina** |
|  | *Dendrocygna autumnalis* | Black-bellied whistling-duck | Least concern | Liver, bone and blood  Inductively Coupled Plasma-Atomic Emission Spectrometry | Lead ammunition | **Inland wetlands**  **Liver:** 0.21 ± 2.10 mg/Kg dm (BDL-0.79) n=14  **Bone:** 3.68 ± 3.07 mg/Kg dm (1.30–34.40) n=14  **Island wetlands**  **Liver:** 0.16 ± 2.42 mg/Kg dm (BDL-0.59) n=4  **Bone:** 4.83 ± 3.62 mg/Kg dm (1.10–11.50) n=3  **Blood:** 0.19 ± 2.66 mg/Kg wm (BDL-4.71) n=4 | Yes | Ferreyra et al., 2014  **Argentina** |
|  | *Dendrocygna autumnalis* | Black-bellied whistling-duck | Least concern | Liver, bone and blood  Inductively Coupled Plasma-Atomic Emission Spectrometry | Lead ammunition | **Liver:** 0.2 ± 2.14 mg/Kg dm (BDL-0.79)n=17-18  **Bone:** 3.86 ± 3.05 mg/Kg dm (1.10–34.40) n=17-18  **Blood:** 0.19 ± 2.66 mg/Kg dm (BDL–4.71) n=13-17 | Yes | Ferreyra et al., 2015  **Argentina** |
| **Order** | **Scientific name** | **Common name** | **Conservation status IUCN** | **Sampled type and methodology** | **Presumed Source of lead** | **Concentration Mean ± SD and Range**  **mg/kg dry mass (dm) or mg/kg wet mass (wm)** | **Individuals upper threshold levels **** | **Article and country** |
|  | *Cygnus melancoryphus* | Black-necked swan | Least concern | Liver, kidney and muscle  Atomic Absorption Spectrophotometer | Pollution-Mining | **Liver**: 1.5 mg/Kg wm n=1  **Kidney:** 1.80 mg/Kg wm n=1  **Muscle:** mg/Kg wm0.10 n=1 | No | Gil et al., 2006  **Argentina** |
|  | *Amazonetta brasiliensis* | Brazilian teal | Least concern | Liver, bone, and blood  Inductively Coupled Plasma-Atomic Emission Spectrometry | Lead ammunition | **Liver:** 0.28 ± 2.75 mg/Kg dm (BDL-16.90) n=57  **Bone:** 2.35 ± 2.55 mg/Kg dm (0.30–389) n=57  **Blood**: BDL n=6 | Yes | Ferreyra et al., 2014  **Argentina** |
|  | *Amazonetta brasiliensis* | Brazilian teal | Least concern | Liver, bone, and blood  Inductively Coupled Plasma-Atomic Emission Spectrometry | Lead ammunition | **Liver:** 0.28 ± 2.75 mg/Kg dm (BDL-16.90) n=57  **Bone:** 2.35 ± 2.55 mg/Kg dm (0.30–389) n=57  **Blood**: BDL n=6 | Yes | Ferreyra et al., 2015  **Argentina** |
|  | *Netta peposaca* | Rosy-billed pochard | Least concern | Bone  Atomic Absorption with Electrothermic Atomization | Lead ammunition | **Bone**: Some individuals show values upper> 20 mg/Kg dm n=16 | Yes | Ferreyra et al., 2009  **Argentina** |
| **Order** | **Scientific name** | **Common name** | **Conservation status IUCN** | **Sampled type and methodology** | **Presumed Source of lead** | **Concentration Mean ± SD and Range**  **mg/kg dry mass (dm) or mg/kg wet mass (wm)** | **Individuals upper threshold levels **** | **Article and country** |
|  | *Netta peposaca* | Rosy-billed pochard | Least concern | Liver, bone and blood  Inductively Coupled Plasma-Atomic Emission Spectrometry | Lead ammunition | **Inland wetlands 2011**  **Liver:** 2.20 ± 6.67 mg/Kg dm (0.24–38.50) n=7  **Bone:** 4.30 ± 6.70 mg/Kg dm (0.48–46.20) n=7  **Island wetlands 2011**  **Liver:** 0.30 ± 3.66 mg/Kg dm (BDL-7.65) n=80  **Bone:** 3.15 ± 4.25 mg/Kg dm (0.30–143) n=75  **Island wetlands 2012**  **Liver:** 0.23 ± 2.26 mg/Kg dm (BDL-1.04) n=13  **Bone:** 4.60 ± 4.42 mg/Kg dm (0.60–56.80) n=13  **Blood:** BDL n=4 | Yes | Ferreyra et al., 2014  **Argentina** |
|  | *Netta peposaca* | Rosy-billed pochard | Least concern | Blood, bone and liver  Inductively Coupled Plasma-Atomic Emission Spectrometry | Lead ammunition | **Liver**: 0.33 ± 4.00 mg/Kg dm (BDL-38.5) n= 42-100  **Bone:** 3.39 ± 4.38 mg/Kg dm (0.30–143.2) n=42-100  **Blood:** BDL n=4 | Yes | Ferreyra et al., 2015  **Argentina** |
| **Order** | **Scientific name** | **Common name** | **Conservation status IUCN** | **Sampled type and methodology** | **Presumed Source of lead** | **Concentration Mean ± SD and Range**  **mg/kg dry mass (dm) or mg/kg wet mass (wm)** | **Individuals upper threshold levels **** | **Article and country** |
| **Podicipediformes** | *Podicephorus major* | Great grebe | Least concern | Muscle, bone, liver, gonads and brain  Graphite Furnace Atomic Absorption Spectrometry | Human activities. motor boat and fisher sinkers | **Muscle:** 3.88 ± 2.95 mg/kg dm (0.93-6.83) n=2  **Liver:** 2.13 ± 0.59 mg/kg dm (1.54-2.72) n=2  **Bone:** 0.85 ± 0.60 mg/kg dm (0.26-1.45) n=2  **Gonad**: 5.81 ± 2.23 mg/kg dm (3.59-8.04) n=2  **Brain:** 5.34 ± 1.84 mg/kg dm (3.50-7.18) n=2 | No | Cid et al., 2009  **Argentina** |
|  | *Podicephorus major* | Great grebe | Least concern | Liver, kidney and muscle  Atomic Absorption Spectrophotometer | Pollution, Mining | **Liver:** 2.60 mg/kg wm n=1  **Kidney:** 2.40 mg/kg wm n=1 | No | Gil et al., 2006  **Argentina** |
|  | [*Podiceps occipitalis*](http://www.iucnredlist.org/details/62114375/0) | Southern silvery grebe | Least concern | Liver, kidney and muscle  Atomic Absorption Spectrophotometer | Pollution Mining | **Liver:** 3.60 mg/kg wm n=1  **Kidney:** 2.20 mg/kg wm n=1 | No | Gil et al., 2006  **Argentina** |
| **Columbiformes** | *Columbina squammata* | Scaled dove | Least concern | Blood and feathers  Atomic Absorption Spectrophotometer | Car emissions- Mining | **Blood:** 0.10 ± 0.13 mg/Kg dm (0.00-0.38) n=10  **Feathers:** 5.89 ± 5.96 mg/Kg dm (1.00-16.50) n=10 | Yes | Alpino-Cabrera et al., 2016  **Venezuela** |
| **Order** | **Scientific name** | **Common name** | **Conservation status IUCN** | **Sampled type and methodology** | **Presumed Source of lead** | **Concentration Mean ± SD and Range**  **mg/kg dry mass (dm) or mg/kg wet mass (wm)** | **Individuals upper threshold levels **** | **Article and country** |
| **Apodiformes** | *Adelomyia melanogenys* | Speckled hummingbird | Least concern | Feathers  Atomic Absorption Spectrophotometer  X-Ray Energy Disperse Spectroscopy | Pollution | **Feathers:** 4.00 ± 0.36 mg/Kg dm n=2 | Yes | Góngora et al., 2016  **Colombia** |
|  | *Eriocnemis vestita* | Glowing puffleg | Least concern | Feathers  Atomic Absorption Spectrophotometer  X-Ray Energy Disperse Spectroscopy | Pollution | **Feathers:** 1.89 ± 0.04 mg/Kg dm n=4 | No | Góngora et al., 2016  **Colombia** |
|  | *Eriocnemis cupreoventris* | Coppery-bellied puffleg | Near Threatened | Feathers  Atomic Absorption Spectrophotometer  X-Ray Energy Disperse Spectroscopy | Pollution | **Feathers:** 2.01 ± 0.74 mg/Kg dm n=2 | No | Góngora et al., 2016  **Colombia** |
|  | *Coeligena bonapartei* | Golden-bellied starfrontlet | Least concern | Feathers  Atomic Absorption Spectrophotometer  X-Ray Energy Disperse Spectroscopy | Pollution | **Feathers:** 3.48 ± 0.41 mg/Kg dm n=2 | Yes | Góngora et al., 2016  **Colombia** |
| **Order** | **Scientific name** | **Common name** | **Conservation status IUCN** | **Sampled type and methodology** | **Presumed Source of lead** | **Concentration Mean ± SD and Range**  **mg/kg dry mass (dm) or mg/kg wet mass (wm)** | **Individuals upper threshold levels **** | **Article and country** |
|  | Ocreatus underwoodii | Booted racket-tail | Least concern | Feathers  Atomic Absorption Spectrophotometer  X-Ray Energy Disperse Spectroscopy | Pollution | **Feathers:** 4.80 ± 0.34 mg/Kg dm n=3 | Yes | Góngora et al., 2016  **Colombia** |
| **Charadriiformes** | *Haematopus palliatus* | American oystercatchers | Least concern | Eggs shell  Atomic Absorption Spectrophotometer | Pollution | **Egg shell:** 7.23 ± 8.02 mg/Kg dm | ----- | Simonetti et al., 2015  **Argentina** |
|  | *Calidris subruficollis* | Buff-breasted sandpiper | Near Threatened | Feathers  Graphite Furnace and Flame Atomic Absorption Spectrophotometry | Pollution | **Feathers:** 2.18 ± 0.63 mg/kg dm n=29 | No | Scherer et al., 2015  **Brazil** |
|  | *Leucophaeus pipixcan* | Franklin's gull | Least concern | Feathers  Inductively Coupled plasma mass Spectrometry | Pollution | **Feathers:** 2.57 ± 5.5 mg/kg dm n=25 | Yes | Sepúlveda and Gonzalez-Acuña, 2014  **Chile** |
| **Order** | **Scientific name** | **Common name** | **Conservation status IUCN** | **Sampled type and methodology** | **Presumed Source of lead** | **Concentration Mean ± SD and Range**  **mg/kg dry mass (dm) or mg/kg wet mass (wm)** | **Individuals upper threshold levels **** | **Article and country** |
|  | *Larus dominicanus* | Kelp gulls | Least concern | Liver and Kidney  Inductively Coupled Plasma Optical Spectrometry | Pollution | **Liver:** 37.80 ± 10.28 mg/kg wm (19.42-.54.11)  n= 39  **Kidney:** 33.94 ± 9.17 mg/kg wm (18.61-44.61)  n= 39 | Yes | Ferreira, 2013  **Brazil** |
|  | *Larus dominicanus* | Kelp gulls | Least concern | Feathers  Graphite Furnace and Flame Atomic Absorption Spectrophotometry | Human emissions | **Feathers Juveniles:** 1.47 ± 0.385 mg/kg dm n=30  **Feathers sub adults: 3**.708 ± 2.024 mg/kg dm n=30  **Feathers adults:** 7.536 ± 1.66 mg/kg dm n=30 | Yes | Barbieri et al., 2010  **Brazil** |
|  | *Larus dominicanus* | Kelp gulls | Least concern | Liver, Kidney and muscle  Atomic Absorption Spectrophotometer | Pollution Mining | **Muscle:** 0.86 mg/kg dm n=6 | No | Gil et al., 2006  **Argentina** |
|  | *Larus dominicanus* | Kelp gulls | Least concern | Feathers  Inductively Coupled plasma mass Spectrometry | Pollution | **Feathers:** 5.97 ± 6.0 mg/kg dm n=22 | Yes | Sepúlveda and Gonzalez-Acuña, 2014  **Chile** |
| **Order** | **Scientific name** | **Common name** | **Conservation status IUCN** | **Sampled type and methodology** | **Presumed Source of lead** | **Concentration Mean ± SD and Range**  **mg/kg dry mass (dm) or mg/kg wet mass (wm)** | **Individuals upper threshold levels **** | **Article and country** |
| **Sphenisciformes** | *Pygoscelis papua* | Gentoo penguin | Least concern | Liver, kidney and brain  Flame Atomic Absorption Spectroscopy | Pollution | **Liver:** 2.78 ± 0.81 mg/Kg dm n=20  **Kidney**: 2.09 ± 1.45 mg/Kg dm n=20  **Brain:** 1.04 ± 0.87 mg/Kg dm n=20 | No | Keymer et al., 2001  **Argentina** |
|  | *Spheniscus humboldti* | Humboldt penguin | Vulnerable | Faecal samples  Graphite Furnace Atomic Absorption Spectrophotometer | Pollution | **Faeces:** Site 1: 1.80 ± 3.00 mg/kg dm n=20  **Faeces:** Site 2: 1.59 ± 2.12 mg/kg dm n=19  **Faeces:** Site 3: 12.79 ± 9.97 mg/kg dm n=24 | ------- | Celis et al., 2014  **Chile** |
|  | *Spheniscus mendiculus* | Galapagos penguin | Endangered | Feathers  Atomic Absorption Spectrophotometer | Pollution | **Feathers:** 193.0 ± 48.30 mg/kg dm n=29 Site 1  **Feathers:** 71.3 ± 35.60 mg/kg dm n=29 Site 2  **Feathers:** 55.5 ± 27.80 mg/kg dm n=29 Site 3 | Yes | Jiménez-Uzcátegui et al., 2017  **Ecuador** |
|  | *Spheniscus magellanicus* | Magellanic penguin | Near Threatened | Liver, kidney and brain  Flame Atomic Absorption Spectroscopy | Pollution | **Liver:** 2.78 ± 0.82 mg/kg dm n=12  **Kidney:** 1.31 ± 0.75 mg/kg dm n=12  **Brain:** 0.75 ± 0.35 mg/kg dm n=12 | No | Keymer et al., 2001  **Argentina** |
|  | *Spheniscus magellanicus* | Magellanic penguin | Near Threatened | Liver, kidney and muscle  Atomic Absorption Spectrophotometer | Pollution  Mining | **Liver:** BDL-5.55 mg/kg wm n=16  **Kidney:** 0.45-2 mg/kg wm n=16  **Muscle:** 0.36-1.63 mg/kg wm n=16 | No | Gil et al., 2006  **Argentina** |
| **Order** | **Scientific name** | **Common name** | **Conservation status IUCN** | **Sampled type and methodology** | **Presumed Source of lead** | **Concentration Mean ± SD and Range**  **mg/kg dry mass (dm) or mg/kg wet mass (wm)** | **Individuals upper threshold levels **** | **Article and country** |
|  | *Spheniscus magellanicus* | Magellanic penguin | Near Threatened | Liver and muscles  Graphite Furnace Atomic Absorption Spectrometry | Pollution | BDL n=47 | No | Vega et al., 2010  **Brazil** |
|  | *Spheniscus magellanicus* | Magellanic penguin | Near Threatened | Feathers, liver, Kidney  Graphite Furnace Atomic Absorption Spectrometry | Pollution | **Liver:** 0.58 ± 0.32 mg/kg dm (0.20–1.33) n=22  **Kidney:** 0.55 ± 0.30 mg/kg dm (0.19–1.16) n=22  **Feathers:** 0.14 ± 0.08 mg/kg dm (0.05–0.32) n=22 | No | Kehrig et al., 2015  **Brazil** |
|  | *Eudyptes chrysocome* | Southern rock hopper penguin | Vulnerable | Liver, kidney and brain  Flame Atomic Absorption Spectroscopy | Pollution | **Liver:** 1.93 ± 1.24 mg/Kg dm n=67  **Kidney**: 2.74 ± 2.34 mg/Kg dm n=67  **Brain:** 0.81± 0.46 mg/Kg dm n=67 | No | Keymer et al., 2001  **Argentina** |
| **Procellariiformes** | *Phoebastria irrorata* | Waved albatross | Critically endangered | Feathers  Atomic Absorption Spectrophotometer | Pollution | BDL | No | Jiménez-Uzcátegui et al., 2017  **Ecuador** |
|  | *Thalassarche melanophris* | Black-browed albatross | Near Threatened | Liver, kidney and muscle  Atomic Absorption Spectrophotometer | Pollution, Mining | **Muscle:** 0.80 mg/Kg wm n=1 | No | Gil et al., 2006  **Argentina** |
| **Order** | **Scientific name** | **Common name** | **Conservation status IUCN** | **Sampled type and methodology** | **Presumed Source of lead** | **Concentration Mean ± SD and Range**  **mg/kg dry mass (dm) or mg/kg wet mass (wm)** | **Individuals upper threshold levels **** | **Article and country** |
|  | *Thalassarche melanophris* | Black-browed albatross | Near Threatened | Feathers  Atomic Absorption Spectrophotometer | Pollution | **Males** n=27  **Primary feather:** 5.71 ± 5.67 mg/Kg dm  **Breast Feather:** 3.17 ± 3.34 mg/Kg dm  **Females** n=17  **Primary feather:** 7.61 ± 12.03 mg/Kg dm  **Breast Feather:** 3.35 ± 2.55 mg/Kg dm | Yes | Seco Pon et al., 2011  **Argentina** |
|  | [*Procellaria aequinoctialis*](http://www.iucnredlist.org/details/22698140/0) | White-chinned petrel | Vulnerable | Feathers  Atomic Absorption Spectrophotometer | Pollution | BDL | No | Seco Pon et al., 2012  **Argentina** |
|  | [*Procellaria aequinoctialis*](http://www.iucnredlist.org/details/22698140/0) | White-chinned petrel | Vulnerable | Feathers and blood  Atomic Absorption Spectrophotometer | Pollution | **Blood:** 33.05 ± 8.48 mg/kg dm  **Feathers:** 8.21 ± 3.53 mg/kg dm | Yes | Carvalho et al., 2013  **Brazil** |
|  | *Procellaria conspicillata* | Spectacled Petrel | Vulnerable | Feathers and blood  Atomic Absorption Spectrophotometer | Pollution | **Blood:** 9.30 ± 4.33 mg/kg dm  **Feathers:** 32.26 ± 8.71 mg/kg dm | Yes | Carvalho et al., 2013  **Brazil** |
| **Order** | **Scientific name** | **Common name** | **Conservation status IUCN** | **Sampled type and methodology** | **Presumed Source of lead** | **Concentration Mean ± SD and Range**  **mg/kg dry mass (dm) or mg/kg wet mass (wm)** | **Individuals upper threshold levels **** | **Article and country** |
|  | *Ardenna grisea* | Sooty shearwater | Near Threatened | Liver, kidney and muscle  Atomic Absorption Spectrophotometer | Pollution  Mining | **Liver:** 0.70-3.50 mg/kg wm n=2  **Kidney.** BDL**-** 2.4 mg/kg wm n=2  **Muscle:** 0.90-1.10 mg/kg wm n=2 | No | Gil et al., 2006  **Argentina** |
|  | *Ardenna gravis* | Great shearwater | Least concern | Liver and kidney  Flame Atomic Absorption Spectrometry | Pollution | **Liver:** Adult: 0.21 ± 0.22 mg/kg dm. Juvenile: 0.15 ± 0.12 mg/kg dm n=15  **Kidney:** Adult: 0.28 ± 0.20 mg/kg dm, Juvenile 0.07 ± 0.07 mg/kg dm n=15 | No | Barbieri et al., 2007  **Brazil** |
| **Suliformes** | *Fregata magnificens* | Magnificent frigatebird | Least concern | Liver and Kidney  Inductively Coupled Plasma Atomic Emission Spectrometry | Pollution | **Liver:** 39.95 ± 8.02 mg/Kg wm (20.82- 59.13) n=43  **Kidney:** 37.35 ± 8.55 mg/Kg wm (15.24- 55.67) n=43 | Yes | Ferreira, 2011b  **Brazil** |
|  | *Sula leucogaster* | Brown booby | Least concern | Liver and Kidney  Inductively Coupled Plasma optical Emission Spectrometry | Human activities | **Liver:** 41.15 ± 12.31 mg/kg wm n=39  **Kidney:** 39.62 ± 12.60 mg/kg wm n=39 | Yes | Ferreira, 2010b  **Brazil** |
|  | *Phalacrocorax gaimardi* | Red-legged cormorant | Near Threatened | Liver, kidney and muscle  Atomic Absorption Spectrophotometer | Pollution, Mining | **Muscle:** 1.30 mg/kg wm n=1 | No | Gil et al., 2006  **Argentina** |
| **Order** | **Scientific name** | **Common name** | **Conservation status IUCN** | **Sampled type and methodology** | **Presumed Source of lead** | **Concentration Mean ± SD and Range**  **mg/kg dry mass (dm) or mg/kg wet mass (wm)** | **Individuals upper threshold levels **** | **Article and country** |
|  | *Phalacrocorax harrisi* | Flightless cormorant | Vulnerable | Feathers  Atomic Absorption Spectrophotometer | Pollution | **Feathers:** 42.60 ± 8.52 mg/kg dm n=30 Site 1  **Feathers:** 17.00 ± 8.51 mg/kg dm n=30 Site 2 | Yes | Jiménez-Uzcátegui et al., 2017  **Ecuador** |
|  | *Phalacrocorax brasilianus* | Neotropic cormorant | Least concern | Muscle, bone, liver, gonads and brain  Graphite Furnace atomic absorption spectrometry | Human activities, motor boat and fisher sinkers | **Muscle:** 2.17 ± 0.38 mg/kg dm (1.08-3.30) n=7  **Bone:** 1.33 ± 0.34 mg/kg dm (0.46-2.34) n=7  **Liver:** 1.88 ± 0.21 mg/kg dm (1.14-2.76) n=7  **Gonad:** 9.68 ± 1.48 mg/kg dm (4.16-14.39) n=7  **Brain:** 1.76 ± 0.17 mg/kg dm (0.95-2.29) n=7 | No | Cid et al., 2009  **Argentina** |
|  | *Phalacrocorax atriceps* | Imperial shag | Least concern | Liver, kidney and muscle  Atomic Absorption Spectrophotometer | Pollution, Mining | **Muscle:** 0.90 mg/kg wm n=1 | No | Gil et al., 2006  **Argentina** |
| **Order** | **Scientific name** | **Common name** | **Conservation status IUCN** | **Sampled type and methodology** | **Presumed Source of lead** | **Concentration Mean ± SD and Range**  **mg/kg dry mass (dm) or mg/kg wet mass (wm)** | **Individuals upper threshold levels **** | **Article and country** |
| **Pelecaniformes** | *Pelecanus occidentalis* | Brown Pelican | Least concern | Liver, kidney, muscle, brain, heart and lung  Inductively Coupled Plasma Optical Emission Spectrometry | Pollution | **Liver:** 0.006 ± 0.01 mg/kg dm n=6  **Kidney:** 0.044 ± 0.11 mg/kg dm n=6  **Muscle:** 0.12 ± 0.29 mg/kg dm n=6  **Brain:** 0.02 ± 0.06 mg/kg dm n=6  **Heart: :** 0.16 ± 0.39 mg/kg dm n=6  **Lung: :** 0.04 ± 0.1 mg/kg dm n=6 | No | Vera et al., 2016  **Venezuela** |
|  | *Nycticorax nycticorax* | Black-crowned night-heron | Least concern | Liver and kidney  Inductively Coupled Plasma Atomic Emission Spectrometry | Pollution | **Liver:** 42.15 ± 4.60 mg/kg wm n=N**A**  **Kidney:** 43.31 ± 5.99 mg/kg wm n= NA | Yes | Ferreira and Horta, 2010  **Brazil** |
|  | [*Butorides striata*](http://www.iucnredlist.org/details/22728182/0) | Green-backed heron | Least concern | Liver, kidney, muscle, bone and feathers  Atomic Absorption Spectrophotometer | Pollution | **Liver:** (BDL) n=8  **Kidney:** BDL (ND to 4.11) mg/Kg wm n=8  **Muscle:** BDL n=8  **Bone**: 15.44 ± 4.92 mg/Kg wm (7.21–20.81) n=8  **Feathers**: (ND–11.76) mg/Kg wm n=8 | Yes | Simonetti et al., 2014  **Argentina** |
| **Order** | **Scientific name** | **Common name** | **Conservation status IUCN** | **Sampled type and methodology** | **Presumed Source of lead** | **Concentration Mean ± SD and Range**  **mg/kg dry mass (dm) or mg/kg wet mass (wm)** | **Individuals upper threshold levels **** | **Article and country** |
|  | *Egretta thula* | Snowy egret | Least concern | Liver and kidney  Inductively Coupled Plasma atomic Emission Spectrometry | Pollution | **Liver:** 51.24 mg/kg wm (39.3-68.33) n=42  **Kidney:** 41.45 mg/kg wm (24.1-67.5) n=42 | Yes | Ferreira, 2011a  **Brazil** |
|  | *Egretta caerulea* | Little blue heron | Least concern | Liver and kidney  Inductively Coupled Plasma atomic Emission Spectrometry | Pollution | **Liver**: 41.15 ± 12.31 mg/kg wm (23.1-62.1) n=22  **Kidney**: 39.62 ± 12.60 mg/kg wm (24.1-67.1) n=22 | Yes | Ferreira, 2010a  **Brazil** |
| **Cathartiformes** | *Vultur gryphus* | Andean condor | Near Threatened | Feathers  Atomic Absorption Spectrophotometer | Lead ammunition | **Feathers:** 1.17 mg/Kg dm (0.01-21.24) n=152 | Yes | Lambertucci et al., 2011  **Argentina** |
|  | *Vultur gryphus* | Andean condor | Near Threatened | Blood and bone  Graphite Furnace Atomic Absorption Spectrophotometry | Lead ammunition | **Blood**: 0.1547 ± 0.2112 mg/kg wm (0.002-1.04) n=76  **Bone:** 23.08 ± 31.39 mg/kg dm (1.30 – 148) n=47 | Yes | Wiemeyer et al., 2017  **Argentina** |
|  | *Coragyps atratus* | Black vulture | Least concern | Blood  Atomic Absorption Spectrophotometer | Petrochemical industries-landfills | **Blood:** 6.85 ± 4.85 mg/kg wm (0.3-15) n=10 | Yes | Bravo et al., 2005  **Venezuela** |
| **Order** | **Scientific name** | **Common name** | **Conservation status IUCN** | **Sampled type and methodology** | **Presumed Source of lead** | **Concentration Mean ± SD and Range**  **mg/kg dry mass (dm) or mg/kg wet mass (wm)** | **Individuals upper threshold levels **** | **Article and country** |
|  | *Cathartes aura* | Turkey vulture | Least concern | Bone  Methodology not available | Lead ammunitions | **Bone:** 3.5 mg/Kg dm n=1 | No | Saggese et al., 2009  **Argentina** |
|  | *Cathartes aura* | Turkey vulture | Least concern | Liver and kidney  Atomic Absorption Spectrophotometer | Mining | **Liver**: 0.86 mg/Kg dm (0.15-7.9) n=40  **Kidney**: 1.05 mg/Kg dm (0.04-9.86) n=40 | Yes | Valladares et al., 2013  **Chile** |
| **Accipitriformes** | *Harpagus bidentatus* | Double-toothed kite | Least concern | Blood  Graphite Furnace Atomic Absorption Spectrophotometer | Lead ammunition | **Blood:** BDL n=1 | No | Shrum, 2009  **Peru** |
|  | *Accipiter bicolor* | Bicolored Hawk | Least concern | Blood  Graphite Furnace Atomic Absorption Spectrophotometer | Lead ammunition | **Blood:** BDL* n=2 | No | Shrum, 2009  **Peru** |
|  | *Buteogallus schistaceus* | Slate-colored hawk | Least concern | Blood  Graphite Furnace Atomic Absorption Spectrophotometer | Lead ammunition | **Blood:** 0.081 mg/Kg wm (BDL - 0.411) n=11 | No | Shrum, 2009  **Peru** |
| **Order** | **Scientific name** | **Common name** | **Conservation status IUCN** | **Sampled type and methodology** | **Presumed Source of lead** | **Concentration Mean ± SD and Range**  **mg/kg dry mass (dm) or mg/kg wet mass (wm)** | **Individuals upper threshold levels **** | **Article and country** |
|  | *Buteogallus lacernulatus* | White-necked hawk | Vulnerable | Liver and kidney  Inductively Coupled Plasma-Optical Emission Spectrometry | Pollution | **Liver:** 41.94 mg/kg wm (37.72-46.43) n=NA  **Kidney**: 42.94 mg/kg wm (34.3-50.3) n=NA | Yes | Ferreira, 2009  **Brazil** |
|  | *Urubitinga urubitinga* | Great black hawk | Least concern | Blood  Graphite Furnace Atomic Absorption Spectrophotometer | Lead ammunition | **Blood:** BDL n= 1 | No | Shrum, 2009  **Peru** |
|  | *Buteogallus coronatus* | Crowd eagle | Endangered | Blood  Methodology not available | Lead ammunitions | **Blood:** 0.027 mg/kg wm n=1 | No | Saggese et al., 2009  **Argentina** |
|  | *Rupornis magnirostris* | Roadside Hawk | Least concern | Blood  Graphite Furnace Atomic Absorption Spectrophotometer | Lead ammunition | **Blood:** 0.105 mg/Kg wm ( (BDL - 1.272)  n=35 | Yes | Shrum, 2009  **Peru** |
|  | *Leucopternis melanops* | Black-faced hawk | Least concern | Blood  Graphite Furnace Atomic Absorption Spectrophotometer | Lead ammunition | **Blood:** 0.056 mg/Kg wm n=1 | No | Shrum, 2009  **Peru** |
|  | *Leucopternis kuhli* | White-browed hawk | Least concern | Blood  Graphite Furnace Atomic Absorption Spectrophotometer | Lead ammunition | **Blood:** BDL n=2 | No | Shrum, 2009  **Peru** |
| **Order** | **Scientific name** | **Common name** | **Conservation status IUCN** | **Sampled type and methodology** | **Presumed Source of lead** | **Concentration Mean ± SD and Range**  **mg/kg dry mass (dm) or mg/kg wet mass (wm)** | **Individuals upper threshold levels **** | **Article and country** |
|  | *Buteo platypterus* | Broad-winged hawk | Least concern | Blood  Graphite Furnace Atomic Absorption Spectrophotometer | Lead ammunition | **Blood:** BDL n= 1 | No | Shrum, 2009  **Peru** |
| **Falconiformes** | *Micrastur ruficollis* | Barred forest-falcon | Least concern | Blood  Graphite Furnace Atomic Absorption Spectrophotometer | Lead ammunition | **Blood:** 0.080 mg/kg wm (BDL - 0.605) n=9 | Yes | Shrum, 2009  **Peru** |
|  | *Micrastur gilvicollis* | Lined forest-falcon | Least concern | Blood  Graphite Furnace Atomic Absorption Spectrophotometer | Lead ammunition | **Blood:** 0.14 mg/kg wm (BDL - 0.494) n=12 | Yes | Shrum, 2009  **Peru** |
|  | *Micrastur mirandollei* | Slaty-backed forest-falcon | Least concern | Blood  Graphite Furnace Atomic Absorption Spectrophotometer | Lead ammunition | **Blood:** BDL n=2 | No | Shrum, 2009  **Peru** |
|  | *Micrastur semitorquatus* | Collared forest-falcon | Least concern | Blood  Graphite Furnace Atomic Absorption Spectrophotometer | Lead ammunition | **Blood:** BDL n=4 | No | Shrum, 2009  **Peru** |
|  | *Micrastur buckleyi* | Buckley's forest-falcon | Least concern | Blood  Graphite Furnace Atomic Absorption Spectrophotometer | Lead ammunition | **Blood:** BDL n=2 | No | Shrum, 2009  **Peru** |
| **Order** | **Scientific name** | **Common name** | **Conservation status IUCN** | **Sampled type and methodology** | **Presumed Source of lead** | **Concentration Mean ± SD and Range**  **mg/kg dry mass (dm) or mg/kg wet mass (wm)** | **Individuals upper threshold levels **** | **Article and country** |
|  | *Caracara plancus* | Southern Caracara | Least concern | Feather and Liver  Inductively Coupled Plasma Optical Spectrometry | Pollution | **Feather (dead):** 5.74 ± 0.78 mg/kg dm n=21  **Feather (Live):** 5.27 ± 1.22 mg/kg dm n=21  **Liver:**1.36 ± 0.11 mg/kg dm n=21 | Yes | Da Silva et al., 2017  **Brazil** |
|  | *Daptrius ater* | Black caracara | Least concern | Blood  Graphite Furnace Atomic Absorption Spectrophotometer | Lead ammunition | **Blood**: BDL n=1 | No | Shrum, 2009  **Peru** |
| **Passeriformes** | *Pitangus sulphuratus* | Great kiskadee | Least concern | Muscle, bone, liver, gonads and brain  Graphite Furnace Atomic Absorption Spectrometry | Human activities. motor boat and fisher sinkers | **Muscle:** 3.81 ± 0.81 mg/kg dm (1.39-6.19) n=6  **Bone:** 3.60 ±0.63 mg/kg dm (2.07-5.86) n=6  **Liver:** 4.78 ±0.92 mg/kg dm (2.94-9.21) n=6  **Gonad**: 8.05 ± 0.72 mg/kg dm (4.85-9.86) n=6  **Brain:** 11.15 ± 5.04 mg/kg dm (2.44-33.36) n=6 | Yes | Cid et al., 2009  **Argentina** |
|  | [*Cyclarhis gujanensis*](http://www.iucnredlist.org/details/22705124/0) | Rufous-browed peppershrike | Least concern | Liver, Kidney, hearth and intestine  Atomic Absorption Spectrophotometer | Batteries | **Pool:** 7.48 mg/Kg dm n=1 | Yes | Martins et al., 2010  **Brazil** |
| **Order** | **Scientific name** | **Common name** | **Conservation status IUCN** | **Sampled type and methodology** | **Presumed Source of lead** | **Concentration Mean ± SD and Range**  **mg/kg dry mass (dm) or mg/kg wet mass (wm)** | **Individuals upper threshold levels **** | **Article and country** |
|  | *Turdus fuscater* | Great thrush | Least concern | Liver, kidney , spleen, lung and brain  Graphite Furnace Atomic Absorption Spectrometry | Pollution | **Liver:** 0.29 ± 0.04 mg/kg wm n=3  **Kidney:** 0.21 ± 0.09 mg/kg wm n=3  **Spleen:** 0.17 ± 0.09 mg/kg wm n=3  **Lung:** 0.24 ± 0.09 mg/kg wm n=3  **Brain:** 0.18 ± 0.09 mg/kg wm n=3 | No | Cubillos et al., 2017  **Colombia** |
|  | [*Conirostrum speciosum*](http://www.iucnredlist.org/details/22722083/0) | Chestnut-vented conebill | Least concern | Liver, Kidney, hearth and intestine  Atomic Absorption Spectrophotometer | Batteries | **Pool:** 7.38 mg/Kg dm n=1 | Yes | Martins et al., 2010  **Brazil** |
|  | [*Dacnis cayana*](http://www.iucnredlist.org/details/22722991/0) | Blue dacnis | Least concern | Liver, Kidney, hearth and intestine  Atomic Absorption Spectrophotometer | Batteries | **Pool**: mg/Kg dm 6.79-7.98 n=3 | Yes |  |
|  | [*Tangara sayaca*](http://www.iucnredlist.org/details/22722534/0) | Sayaca tanager | Least concern | Liver, Kidney, hearth and intestine  Atomic Absorption Spectrophotometer | Batteries | **Pool:** 11.55-12.74 mg/Kg dm n=2 | Yes | Martins et al., 2010  **Brazil** |

* Below detectable levels

** according Table S2 or the conclusions of the article cited

**REFERENCES**

Alpino-Cabrera, M., Muñoz-Gil, J., Marín-Espinoza, G., 2016. Heavy metals in the scaled dove(*Columbina squammata*), from state of Sucre, Venezuela. The biologist 14, 45-63.

American Ornithologycal Society. South American Classification Committee. A Classification of the Bird Species of South America

<http://www.museum.lsu.edu/~Remsen/SACCBaseline10.htm>. (Acceded 16 July 2018)

Barbieri, E., De Andrade Passos, E., Filippini, A., Dos Santos, I.S., Garcia, C.A.B., 2010. Assessment of trace metal concentration in feathers of seabird (*Larus dominicanus*) sampled in the Florianópolis, SC, Brazilian coast. Environ. Monit. Assess. 169, 631–638.

Barbieri, E., Borges Garcia, C.A.B., De Andrade Passos, E., Aragão, K.A.S., Alves, J., 2007. Heavy metal concentration in tissues of *Puffinus gravis* sampled on the Brazilian coast. 15, 69-72.

Bravo, A., Colina, M., Azuero, S., Salas, R., 2005. Heavy metal levels in plasma and fecal material samples of the black vulture (*Coragyps atratus*). Rev. Cient. 15, 319-325.

Carvalho, P.C., Bugoni, L., Mc Gill, R.A., Bianchini, A., 2013. Metal and selenium concentrations in blood and feathers of petrels of the genus Procellaria. Environ. Toxicol. Chem. 32, 1641–1648.

Celis, J.E., Espejo, W., González-Acuña, D., Jara, S., Barra, R., 2014. Assessment of trace metals and porphyrins in excreta of Humboldt penguins (*Spheniscus humboldti*) in different locations of the Northern coast of Chile. Environ. Monit. Assess. 186, 1815–1824.

Cid, F.D., Gatica-Sosa, C., Antón, R.I., Caviedes-Vidal, E., 2009. Contamination of heavy metals in birds from Embalse La Florida (San Luis, Argentina). J. Environ. Monit. 11, 2044–2051.

Cubillos, J.A., Rodríguez-Flórez, C.N., Rocha-Caicedo, C.A., Prieto, R.B., 2017. Monitoreo de cadmio y plomo en tejidos de *Turdus fuscater* en Sogamoso (Boyacá-Colombia). Bistua Rev. Fac. Cienc. Bas. DOI: https://doi.org/10.24054/01204211.v1.n1.2017.2551.

Da Silva, L.T.R., De Oliveira Filho, E.F., De Holanda Kunst, T., Rolim, V.P.M., De Silva, J.S. de A., Regueira, R.F.S., Paim, A.P.S., Soares, P.C., Da Fonseca Oliveira, A.A., 2017. Heavy metal concentrations in free-living Southern caracaras (*Caracara plancus*) in the Northeast region of Brazil. Acta Sci. Vet. 45, 1508.

Ferreira, A.P., 2013. Heavy metals levels in *Larus dominicanus*. Case study: Coroa Grande mangrove, Sepetiba Bay, Rio de Janeiro, Brazil. Rev. Uniandrade 12, 54–66.

Ferreira, A.P., 2011a. Assessment of heavy metals in *Egretta thula*: Case study: Coroa Grande mangrove, Sepetiba Bay, Rio de Janeiro, Brazil. Braz. J. Biol. 71, 77–82.

Ferreira, A.P., 2011b. Trace metals concentration in *Fregata magnificens*: A case study of Coroa Grande mangrove in Sepetiba Bay, Rio de Janeiro, Brazil. J. Oceanogr. Mar. Sci. 2, 43–49.

Ferreira, A.P., 2010a. Estimation of heavy metals in little blue heron (*Egretta caerulea*) collected from Sepetiba Bay, Rio de Janeiro, Brazil. Braz. J. Oceanogr. 58, 269–274.

Ferreira, A.P., 2010b. Trace metals analysis in brown booby (*Sula leucogaster*) collected from Ilha Grande bay, Rio de Janeiro, Brazil. Rev. Uniandrade 11, 41–54.

Ferreira, A.P., Horta, M.A.P., 2010. Trace element residues in water, sediments, and organs of savacu (*Nycticorax nycticorax*) from Sepetiba Bay, Rio de Janeiro, Brazil. Ambiente Água- Interdiscip. J. Appl. Sci. 5, 17-28.

Ferreira, A.P., 2009. Avaliação das concentrações de metais pesados no sedimento, água e em *Leucopternis lacernulata* (gavião-pomba). Estudo de caso: Baía de Sepetiba, Rio de Janeiro. Gaia Sci. 3. 23-21.

Ferreyra, H., Beldomenico, P.M., Marchese, K., Romano, M., Caselli, A., Correa, A.I., Uhart, M., 2015. Lead exposure affects health indices in free-ranging ducks in Argentina. Ecotoxicology 24, 735–745.

Ferreyra, H., Romano, M., Beldomenico, P., Caselli, A., Correa, A., Uhart, M., 2014. Lead gunshot pellet ingestion and tissue lead levels in wild ducks from Argentine hunting hotspots. Ecotoxicol. Environ. Saf. 103, 74–81.

Ferreyra, H., Romano, M., Uhart, M., 2009. Recent and chronic exposure of wild ducks to lead in human-modified wetlands in Santa Fe Province, Argentina. J. Wildl. Dis. 45, 823–827.

Garitano-Zavala, Á., Cotín, J., Borràs, M., Nadal, J., 2010. Trace metal concentrations in tissues of two tinamou species in mining areas of Bolivia and their potential as environmental sentinels. Environ. Monit. Assess. 168, 629–644.

Gil, M.N., Torres, A., Harvey, M., Esteves, J.L., 2006. Metales pesados en organismos marinos de la zona costera de la Patagonia Argentina continental. Rev. Biol. Mar. Oceanogr. 41, 167–176.

Góngora, E., Cadena, C.D., Dussán, J., 2016. Toxic metals and associated sporulated bacteria on Andean humming bird feathers. Environ. Sci. Pollut. Res. 23, 22968–22979.

Jiménez-Uzcátegui, G., Vinueza, R.l., Urbina, A.S., Egas, D.A., García, C., 2017. Lead and cadmium levels in Galapagos penguin *Spheniscus mendiculus*, flightless cormorant *Phalacrocorax harrisi*, and waved albatross *Phoebastria irrorata*. Mar. Ornithol. 45, 159–163.

Kehrig, H.A., Hauser-Davis, R.A., Seixas, T.G., Fillmann, G., 2015. Trace-elements, methylmercury and metallothionein levels in Magellanic penguin (*Spheniscus magellanicus*) found stranded on the Southern Brazilian coast. Mar. Pollut. Bull. 96, 450–455.

Keymer, I.F., Malcolm, H.M., Hunt, A., Horsley, D.T., 2001. Health evaluation of penguins (Sphenisciformes) following mortality in the Falklands (South Atlantic). Dis. Aquat. Organ. 45, 159–169.

Lambertucci, S.A., Donázar, J.A., Huertas, A.D., Jiménez, B., Sáez, M., Sanchez-Zapata, J.A., Hiraldo, F., 2011. Widening the problem of lead poisoning to a South-American top scavenger: Lead concentrations in feathers of wild Andean condors. Biol. Conserv. 144, 1464–1471.

Martins, N.R.S., Marques, M.V.R., Dar, V., Resende, J.S., Carvalhaes, A.G., Andrade, E.A.G., Barrios, P.R., 2010. Lead poisoning mortality in wild Passeriformes and its detection in free-range chicken eggs in Southern Minas Gerais, Brazil. Rev. Bras. Ciênc. Avícola 12, 149–152.

Saggese, M.D., Quaglia, A., Lambertucci, S.A., Bo, M.S., Sarasola, J.H., Pereyra- Lobos, R., Maceda, J.J., 2009. Survey of lead toxicosis in free-ranging raptors from central Argentina, in: Watson, R.T., Fuller, M., Pokras, M., Hunt, W.G. (Eds.), Ingestion of Lead from Spent Ammunition: Implications for Wildlife and Humans. The Peregrine Fund, Boise, Idaho, pp. 223–231.

Scherer, J.F.M., Scherer, A.L., Barbieri, E., Petry, M.V., Valiati, V.H., 2015. Trace elements concentrations in buff-breasted sandpiper sampled in Lagoa do Peixe National Park, Southern Brazil. Braz. J. Biol. 75, 932–935.

Seco Pon, J.P.S., Beltrame, O., Marcovecchio, J., Favero, M., Gandini, P., 2012. Assessment of trace metal concentrations in feathers of white-chinned petrels, *Procellaria aequinoctialis*, from the Patagonian shelf. Environ. Pollut. 1, 29-37.

Seco Pon, J.P.S., Beltrame, O., Marcovecchio, J., Favero, M., Gandini, P., 2011. Trace metals (Cd, Cr, Cu, Fe, Ni, Pb, and Zn) in feathers of black-browed albatross *Thalassarche melanophrys* attending the Patagonian Shelf. Mar. Environ. Res. 72, 40–45.

Sepúlveda, M., Gonzalez-Acuña, D., 2014. Comparison of heavy metals from resident *Larus dominicanus* and migratory *Leucophaeus pipixcan* collected in Talcahuano, Chile. Arch. Med. Vet. 46, 299-304.

Shrum, P.L., 2009. Analysis of mercury and lead in birds of prey from gold-mining areas of the Peruvian Amazon. Clemson University.

Simonetti, P., Botté, S.E., Beltzer, A.H., Marcovecchio, J.E., 2014. Tissue distribution of Cd, Cu, Zn, Ni, Cr, Pb and Hg in striated heron, *Butorides striatus* (Aves: Ardeidae), in a fluvial ecosystem. Chem. Ecol. 30, 197–205.

Simonetti, P., Botté, S.E., Marcovecchio, J.E., 2015. Exceptionally high Cd levels and other trace elements in eggshells of American oystercatcher (*Haematopus palliatus*) from the Bahía Blanca Estuary, Argentina. Mar. Pollut. Bull. 100, 495–500.

Valladares, F., Alvarado, S., Urra, R., Abarca, J., Inostroza, J., Codoceo, J., Ruz, M., others, 2013. Cadmium and lead content in liver and kidney tissues of wild turkey vulture *Cathartes aura* (Linneo, 1758) from Chañaral, Atacama desert, Chile. Gayana 77, 97-104.

Vega, C.M., Siciliano, S., Barrocas, P.R., Hacon, S.S., Campos, R.C., Do Couto Jacob, S., Ott, P.H., 2010. Levels of cadmium, mercury, and lead in Magellanic penguins (*Spheniscus magellanicus*) stranded on the Brazilian Coast. Arch. Environ. Contam. Toxicol. 58, 460–468.

Vera, M., Muñoz, J., Marín, G., 2016. Determinación de metales pesados (Cr, Cu, Cd, Zn, Ni y Pb) en el alcatraz (*Pelecanus occidentalis*), en el estado Sucre, Venezuela. Bol. Inst. Ocean. Venezuela 55, 19-31.

Wiemeyer, G.M., Pérez, M.A., Bianchini, L.T., Sampietro, L., Bravo, G.F., Jácome, N.L., Astore, V., Lambertucci, S.A., 2017. Repeated conservation threats across the Americas: High levels of blood and bone lead in the Andean condor widen the problem to a continental scale. Environ. Pollut. 220, 672-679.
