# Supplementary material
Source: Elsevier journal article supplement (https://www.sciencedirect.com/science/article/pii/S2530064417302067)
Supplement: mmc2 [file S2530064417302067:mmc2.docx]

**Table S2:** Threshold levels according with tissue sampled in previous published researches.

| **Tissue** | **Threshold levels** | **References** |
| --- | --- | --- |
| **Blood** | 0.15 mg/kg wm * (0.69 mg/kg dm) | Espín et al., 2015 |
| **Bone** | 10 mg/kg dm ** | Pain, 1996 |
| **Feathers** | 4 mg/kg dm | Burger and Gochfeld, 1994; Lambertucci et al., 2011 |
| **Liver** | 1.5 mg/kg wm (4.65 mg/kg dm) | Guitart et al., 1994 |
| **Kidney** | 3 mg/kg wm (12.9 mg/kg dm) | Guitart et al., 1994 |

* wm: wet mass **dm: dry mass

**REFERENCES**

Burger, J., Gochfeld, M., 1994. Behavioral impairments of lead-injected young herring gulls in nature. Toxicol. Sci. 23, 553–561.

Espín, S., Martínez-López, E., Jiménez, P., María-Mojica, P., García-Fernández, A.J., 2015. Delta-aminolevulinic acid dehydratase (δALAD) activity in four free-living bird species exposed to different levels of lead under natural conditions. Environ. Res. 137, 185–198.

Guitart, R., To-Figueras, J., Mateo, R., Bertolero, A., Cerradelo, S., Martínez-Vilalta, A., 1994. Lead poisoning in waterfowl from the Ebro Delta, Spain: Calculation of lead exposure thresholds for mallards. Arch. Environ. Contam. Toxicol. 27, 289–293.

Lambertucci, S.A., Donázar, J.A., Huertas, A.D., Jiménez, B., Sáez, M., Sanchez-Zapata, J.A., Hiraldo, F., 2011. Widening the problem of lead poisoning to a South-American top scavenger: Lead concentrations in feathers of wild Andean condors. Biol. Conserv. 144, 1464–1471.

Pain, D.J., 1996. Lead in waterfowl. Lewis Publishers: New York.
